# Supplementary material for: Omega-3 intake is associated with liver disease protection
Source: PubMed Central journal article supplement (PMC10394692; doi:10.3389/fpubh.2023.1192099), 2023-07-19
Supplement: Data_Sheet_1.pdf [file Data_Sheet_1.pdf]

## **Supplementary Appendix**

This supplement was provided by the authors to give further information on the analyses.

Mara Sophie Vell, Kate Townsend Creasy, PhD, Eleonora Scorletti, MD, PhD, Katharina Sophie Seeling, Leonida Hehl, Miriam Daphne Rendel, Kai Markus Schneider, MD PhD, Carolin Victoria Schneider, MD

---

**Supplementary Appendix**

---

Supplementary Tables S1-S3.....Page 3-6

Table S1

| Table S1. Numerical code of the medication |                                                                   |                                                                                                                                                                                                                                                                                                                                                                                                                                                                                    |
|--------------------------------------------|-------------------------------------------------------------------|------------------------------------------------------------------------------------------------------------------------------------------------------------------------------------------------------------------------------------------------------------------------------------------------------------------------------------------------------------------------------------------------------------------------------------------------------------------------------------|
| Medication                                 | Specification                                                     | Included Code                                                                                                                                                                                                                                                                                                                                                                                                                                                                      |
| Aspirin*                                   |                                                                   | 1140909772, 1140861804, 1140868226, 1140861806, 1140882392, 1140882268, 1140882108, 1140882190, 1140868282, 1140872040, 1141163138, 1141167848, 1140909888, 1140871080, 1140925942, 1140923344, 1140856336, 1141167844, 1140861808, 1140882192, 1141151924, 1140868264, 1140882106, 1140856394, 1141164050, 1141164044, 1140856314, 1140863514, 1140856220, 1141177826, 1140872032, 1140864860, 1140856212, 1141188536, 1140917408, 1140868294, 1140856440, 1140856214, 1140856344 |
| Biguanide*                                 | Metformin                                                         | 1140921964, 1140874686, 1140884600, 1141189090, 1141153138                                                                                                                                                                                                                                                                                                                                                                                                                         |
| Insulin                                    |                                                                   | 1140883066                                                                                                                                                                                                                                                                                                                                                                                                                                                                         |
| Omega-3                                    |                                                                   | 1140861884, 1141181868, 1193, 1140909674                                                                                                                                                                                                                                                                                                                                                                                                                                           |
| Statin                                     | Atorvastatin, Fluvastatin, Pravastatin, Rosuvastatin, Simvastatin | 1141146234, 1141192414, 1140910632, 1140888594, 1140864592, 1141146138, 1140861970, 1140888648, 1141195196, 1141192410, 1141188146, 1140861958, 1140910652, 1140910654, 1140881748, 1141200040                                                                                                                                                                                                                                                                                     |
| Multivitamin Supplements*                  |                                                                   | 1140870488,1140858368,1140877706,1141164602,1140876592,1140852976,1140909766,1141167678,1140852916,1140852920,1140871060,1140871162,1141173902                                                                                                                                                                                                                                                                                                                                     |
| Vitamin C Supplement*                      |                                                                   | 1140909730,1140858300,1140858370,1140852900,1140870786,1140852870,1140852872,1140852908,1140870492,1140852910,1140870946,1140911682,1140852918                                                                                                                                                                                                                                                                                                                                     |
| Vitamin B12 Supplement*                    |                                                                   | 1140870508,1140870512,1140870516,1140870520,1140858304,1140858306,1140858452,1141173348,1140870504,1140852900,1140852870,1140870492,1140852918                                                                                                                                                                                                                                                                                                                                     |

\*Combined preparations possible. Particularly in the case of combined nutritional supplements, there can be an overlap of numerical codes.

Table S2

| Table S2. Metabolic profile $\omega$ -3 users |        |                              |
|-----------------------------------------------|--------|------------------------------|
|                                               | beta   | $-\log_{10}(\text{p-value})$ |
| Phosphoglycerides                             | 0.004  | 1.607                        |
| Sphingomyelins                                | 0.011  | 10.238                       |
| ApoB                                          | 0.017  | 10.723                       |
| ApoA1                                         | -0.001 | 0.157                        |
| Total Fatty Acids                             | 0.002  | 0.374                        |
| Omega-3 Fatty Acids                           | 0.125  | 161.574                      |
| Omega-6 Fatty Acids                           | 0.002  | 0.693                        |
| PUFA                                          | 0.015  | 16.439                       |
| MUFA                                          | -0.016 | 5.744                        |
| Saturated Fatty Acids                         | -0.003 | 0.525                        |
| Linoleic Acid                                 | 0.000  | 0.077                        |
| Docosahexaenoic Acid                          | 0.115  | 203.450                      |
| Albumin                                       | 0.007  | 10.320                       |
| Glycoprotein Acetyls                          | -0.010 | 9.137                        |
| Concentration of Large VLDL Particles         | 0.002  | 0.099                        |
| Total Lipids in Large VLDL                    | 0.005  | 0.407                        |
| PL in Large VLDL                              | -0.004 | 0.268                        |
| C in Large VLDL                               | 0.009  | 0.999                        |
| TG in Large VLDL                              | 0.006  | 0.528                        |
| Concentration of Medium VLDL Particles        | 0.019  | 6.076                        |
| Total Lipids in Medium VLDL                   | 0.017  | 4.788                        |
| PL in Medium VLDL                             | 0.020  | 5.641                        |
| C in Medium VLDL                              | 0.029  | 11.189                       |
| TG in Medium VLDL                             | 0.009  | 1.308                        |
| Concentration of Small VLDL Particles         | 0.011  | 2.562                        |
| Total Lipids in Small VLDL                    | 0.012  | 2.998                        |
| PL in Small VLDL                              | 0.017  | 6.237                        |
| C in Small VLDL                               | 0.018  | 5.922                        |
| TG in Small VLDL                              | 0.002  | 0.234                        |
| Concentration of Large LDL Particles          | 0.017  | 9.941                        |
| Total Lipids in Large LDL                     | 0.021  | 14.731                       |
| PL in Large LDL                               | 0.021  | 15.576                       |
| C in Large LDL                                | 0.023  | 16.489                       |
| TG in Large LDL                               | -0.006 | 1.428                        |
| Concentration of Medium LDL Particles         | 0.024  | 16.157                       |
| Total Lipids in Medium LDL                    | 0.022  | 12.870                       |
| PL in Medium LDL                              | 0.021  | 12.378                       |
| C in Medium LDL                               | 0.025  | 14.908                       |
| TG in Medium LDL                              | -0.007 | 1.215                        |
| Concentration of Small LDL Particles          | 0.016  | 10.742                       |
| Total Lipids in Small LDL                     | 0.018  | 12.024                       |
| PL in Small LDL                               | 0.018  | 14.456                       |
| C in Small LDL                                | 0.020  | 13.362                       |
| TG in Small LDL                               | -0.010 | 1.872                        |
| Concentration of Large HDL Particles          | 0.006  | 0.641                        |
| Total Lipids in Large HDL                     | 0.004  | 0.364                        |
| PL in Large HDL                               | 0.001  | 0.114                        |
| C in Large HDL                                | 0.008  | 0.880                        |
| TG in Large HDL                               | -0.014 | 2.682                        |
| Concentration of Medium HDL Particles         | -0.003 | 0.543                        |

|                                                                                                                                                                                                                                                                                               |        |       |
|-----------------------------------------------------------------------------------------------------------------------------------------------------------------------------------------------------------------------------------------------------------------------------------------------|--------|-------|
| Total Lipids in Medium HDL                                                                                                                                                                                                                                                                    | -0.004 | 1.197 |
| PL in Medium HDL                                                                                                                                                                                                                                                                              | -0.006 | 2.173 |
| C in Medium HDL                                                                                                                                                                                                                                                                               | -0.001 | 0.129 |
| TG in Medium HDL                                                                                                                                                                                                                                                                              | -0.019 | 5.888 |
| Concentration of Small HDL Particles                                                                                                                                                                                                                                                          | 0.003  | 1.532 |
| Total Lipids in Small HDL                                                                                                                                                                                                                                                                     | -0.001 | 0.268 |
| PL in Small HDL                                                                                                                                                                                                                                                                               | -0.003 | 1.418 |
| C in Small HDL                                                                                                                                                                                                                                                                                | 0.004  | 1.909 |
| TG in Small HDL                                                                                                                                                                                                                                                                               | -0.013 | 3.300 |
| Abbreviations: C, Cholesterol; TG, Triglycerides; PL, Phospholipids; VLDL, Very-low-density lipoprotein; LDL, Low-density lipoprotein; HDL, High-density lipoprotein; ApoB, Apolipoprotein B; ApoA1, Apolipoprotein A1; PUFA, Polyunsaturated fatty acids; MUFA, Monounsaturated fatty acids. |        |       |

Table S3

| <b>Table S3. Associations of Omega-3 intake in patients with lipiodomic data in UKB</b> |                                         |                                     |                |
|-----------------------------------------------------------------------------------------|-----------------------------------------|-------------------------------------|----------------|
| <b>Incident Liver disease (K70-K77)</b>                                                 | <b>No Omega-3 intake<br/>(N=82,218)</b> | <b>Omega-3 intake<br/>(N=8,747)</b> |                |
| No diagnosis (K70-K77)                                                                  | 81,371/82,218                           | 8666/8747                           |                |
| Diagnosis (K70-K77)                                                                     | 847/82,218                              | 81/8747                             |                |
|                                                                                         | <b>No. with Event/<br/>No.*</b>         | <b>Hazard Ratio (95% CI)</b>        | <b>p-value</b> |
|                                                                                         | <b>Incident Liver Disease**</b>         |                                     |                |
| <b>Overall</b>                                                                          | 81/8747                                 | <b>0.726 (0.573 to 0.921)</b>       | <b>8.0e-03</b> |
| <b>in Men***</b>                                                                        | 40/3527                                 | 0.83 (0.60 to 1.17)                 | 0.29           |
| <b>in Women***</b>                                                                      | 41/5220                                 | <b>0.653 (0.467 to 0.912)</b>       | <b>1.2e-02</b> |
| <b><i>PNPLA3</i> rs738409 (wt)</b>                                                      | 47/5383                                 | <b>0.729 (0.533 to 0.997)</b>       | <b>4.8e-02</b> |
| <b><i>PNPLA3</i> rs738409 (het)</b>                                                     | 2/2896                                  | 0.69 (0.46 to 1.04)                 | 0.08           |
| <b><i>PNPLA3</i> rs738409 (hom)</b>                                                     | 7/404                                   | 0.98 (0.42 to 2.32)                 | 0.96           |
| <b><i>TM6SF2</i> rs58542926 (wt)</b>                                                    | 73/7443                                 | <b>0.769 (0.598 to 0.989)</b>       | <b>4.1e-02</b> |
| <b><i>TM6SF2</i> rs58542926 (het)</b>                                                   | 8/1176                                  | 0.59 (0.28 to 1.24)                 | 0.17           |
| <b><i>TM6SF2</i> rs58542926 (hom)</b>                                                   | 0/54                                    | -                                   | -              |
| <b><i>HSD17B13</i> rs72613567 (wt)</b>                                                  | 38/4598                                 | <b>0.670 (0.475 to 0.945)</b>       | <b>2.2e-02</b> |
| <b><i>HSD17B13</i> rs72613567 (het)</b>                                                 | 38/3443                                 | 0.82 (0.58 to 1.17)                 | 0.27           |
| <b><i>HSD17B13</i> rs72613567 (hom)</b>                                                 | 4/625                                   | 0.54 (0.19 to 1.54)                 | 0.25           |
| <b><i>MTARC1</i> rs2642438 (wt)</b>                                                     | 37/4289                                 | 0.75 (0.53 to 1.07)                 | 0.11           |
| <b><i>MTARC1</i> rs2642438 (het)</b>                                                    | 38/3637                                 | 0.75 (0.53 to 1.07)                 | 0.11           |
| <b><i>MTARC1</i> rs2642438 (hom)</b>                                                    | 6/754                                   | 0.58 (0.24 to 1.39)                 | 0.23           |
